# Supplementary material for: Pharmacological inhibition of CDK4/6 impairs diffuse pleural mesothelioma 3D spheroid growth and reduces viability of cisplatin-resistant cells
Source: PubMed Central journal article supplement (PMC11246887; doi:10.3389/fonc.2024.1418951), 2024-07-01

**A**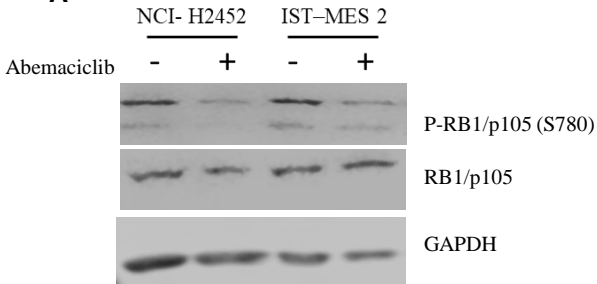**B**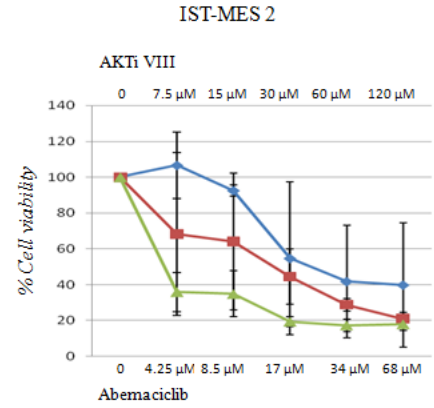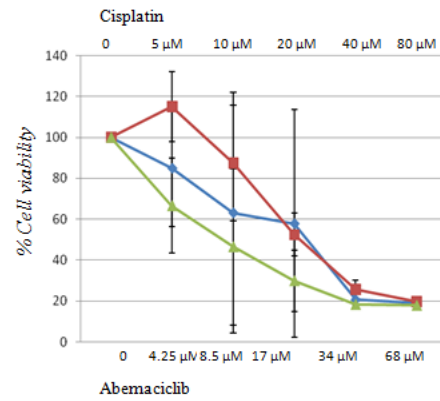

NCI-H2452

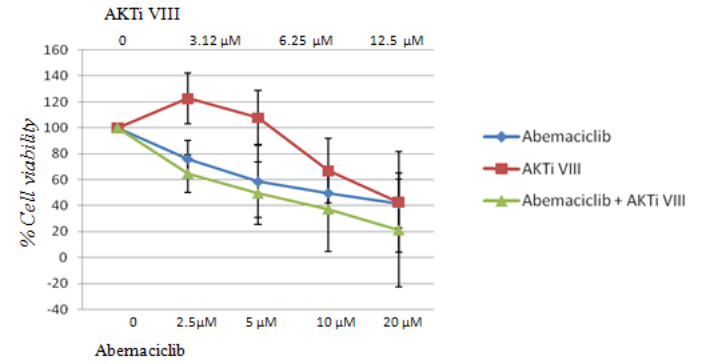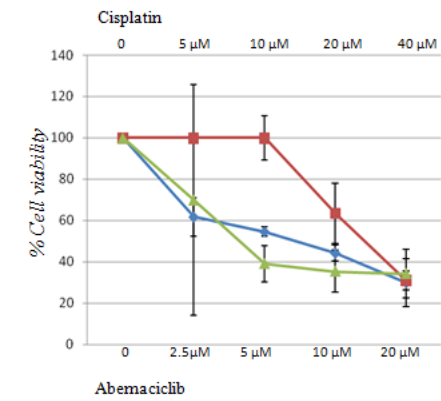

Supplement: DataSheet_1.pdf [file DataSheet_1.pdf]
